# Supplementary material for: A Recombinant Chimeric Protein-Based Vaccine Containing T-Cell Epitopes from Amastigote Proteins and Combined with Distinct Adjuvants, Induces Immunogenicity and Protection against Leishmania infantum Infection
Source: MDPI journal article supplement (doi:10.3390/vaccines10071146), 2022-07-19
Supplement: s1 [file s1]

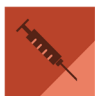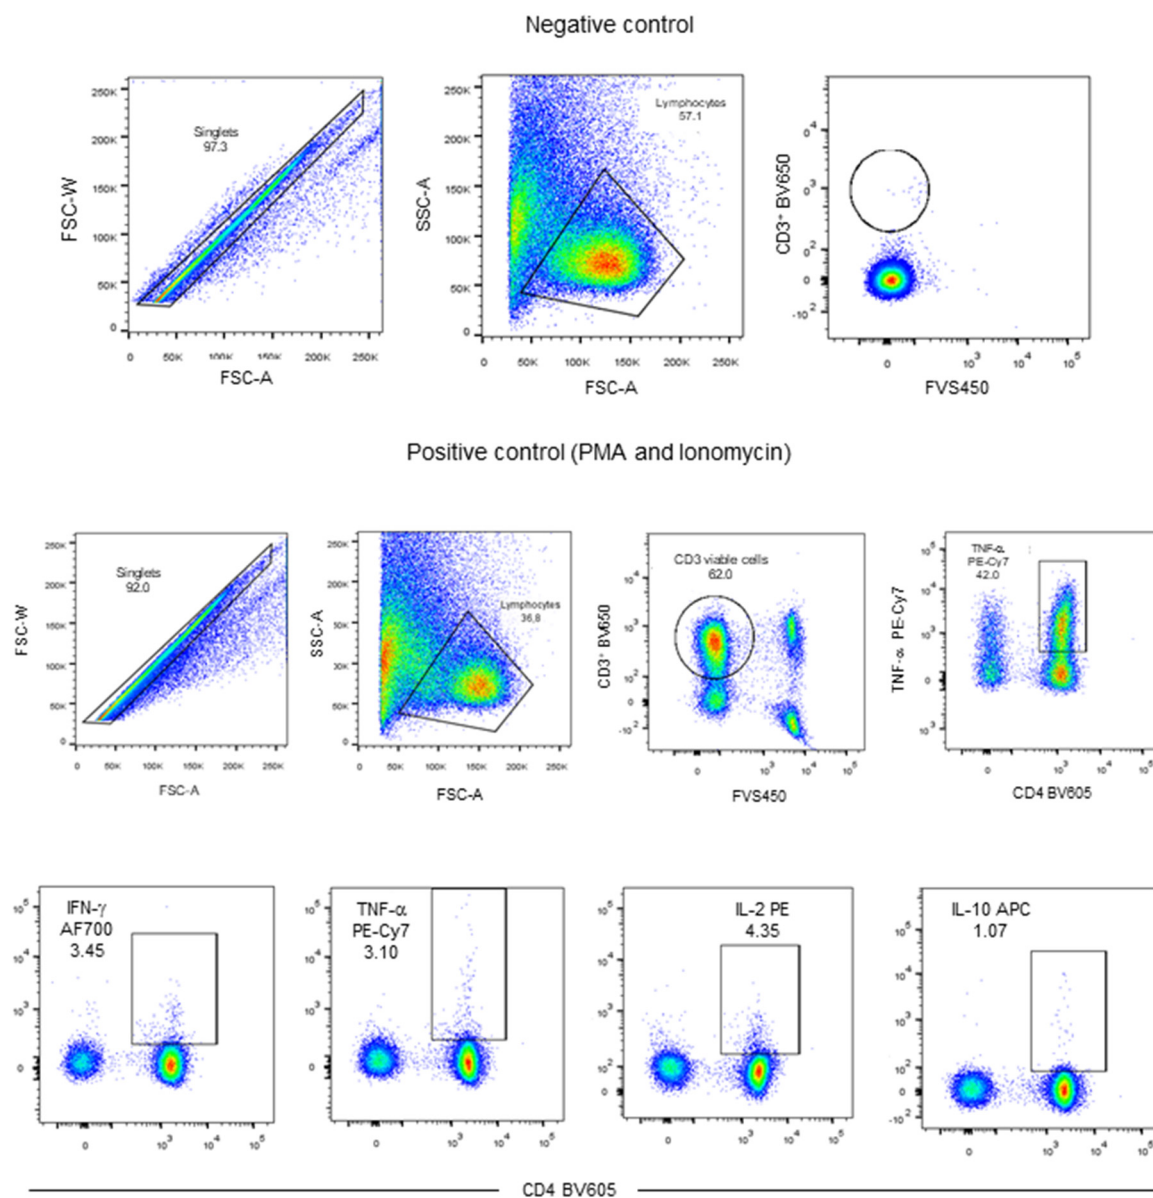

**Figure S1.** Representative plots of gating strategy to evaluate IFN- $\gamma$ , TNF- $\alpha$ , IL-2 and IL-10-producing T cells. The figure shows the control cultures (negative and positive cultures). The positive culture was stimulated with Phorbol 12-Myristate 13-Acetate (PMA-5 ng/mL) and ionomycin (1 mg/mL).
